# Supplementary material for: Mongolian Almond (Prunus mongolica Maxim): The Morpho-Physiological, Biochemical and Transcriptomic Response to Drought Stress
Source: PLoS One. 2015 Apr 20;10(4):e0124442. doi: 10.1371/journal.pone.0124442 (PMC4404049; doi:10.1371/journal.pone.0124442)
Supplement: S1 Table — (XLSX) [file pone.0124442.s004.xlsx]

## Sheet: Sheet1
Transcript	Functional annoation	Primers sequences(5'-3')
comp67082_c0_seq1	GAPDH	ATGGGAGCATCCTTACTTGG
		CACTGGAGTTTTCACCGACA
comp47289_c0_seq1	Oxygen-evolving ehancer protein	TGACTCCTTTGCCCTCTGTG
		GGATTACCTGGAACTCTAAACTCG
comp47789_c0_seq1	Function unknown	TCTGCCAGAGTTTCACCGAT
		GCGAGGTGGAACTTGAGATTA
comp56650_c0_seq1	Function unknown	TCAATCTCGTTTCCATCGG
		GTACATCATCGCCAACAACAC
comp57915_c0_seq1	Function unknown	AGCCGACAACCGGAAGTA
		GGAGGTGATAGTGGCAGAGG
comp60350_c0_seq1	Exopolyphosphatase-like	TCCCAACCAAACACGCAATAAC
		CCAACTTCAAACTTCAACCAACCT
comp60402_c0_seq1	Late embryogenesis abundant protein	TGGGTTTTGTCCTTGGTTG
		CCAGATGATGGGCTCAGTAG
comp61248_c0_seq1	Chlorophyll a-b binding protein	ACAGGGTTGTCAAGGTGGTC
		GCTCAAGGTCAAGGAAATCA
comp61258_c0_seq1	RSI-1 protein precursor	CCATAAACGCCTGGAGGA
		TTCAGAGTGCAAGCCGAGA
comp62739_c0_seq1	Temperature-induced lipocalin	CCCTGTTGTTGGTGATTACTG
		GACGAGGCTGCCTGCTTA
comp64242_c0_seq1	Protease	CGCCACTGCCATAACCATTCA
		CCAATTCTACAACGGATGCCTTCA
comp63546_c2_seq1	Chlorophyll A/B binding protein	GCCCATATTGCGAGAATGC
		CTTTTGCCAAGAACCGTGAA
comp64264_c0_seq1	Heat-shock protein	ACAAAGGCGAAGAAAAGACC
		GGGACAGTCACCACAGCGT
comp65578_c0_seq1	L-ascorbate oxidase	CGTTACGCATTCAACAGAGTC
		GGAAGTCATGGAGTGAGGCT
comp67288_c0_seq3	Function unknown	CAAATGGCCCACGTAAATC
		CCTAGAGGTCGCTATGGAGGT
comp67308_c0_seq2	Light-harvesting complex I protein Lhca2	TCACGGTACGTGCTGCTG
		AGATGAAAGACCAAGGGGAT
comp67881_c0_seq1	Thaumatin-like protein	TCCCACGTCCAGCTCCAT
		CGAAACAACTGCCCCTTCC
comp68903_c0_seq1	BAC insert containing Ma gene	CTCGTGGTTGGTTTGAGTGG
		AATCAGTAAGGGCTCTGTATGG
comp69940_c0_seq1	dehydration-responsive protein	CATCATCGGCTTTCAGGG
		GAAGCAATCTCAACGGAGGTAT
comp70848_c0_seq2	Thaumatin-like protein	ATGCCCTCCCACTGACTACTC
		GAAGGTGCTGCTCTTGTCATCATA
comp73635_c0_seq2	Serine/threonine-protein kinase	AGATTGAAGATTTGGAGGCG
		GATTCTTGGGGTGGACAGC
comp47265_c0_seq1	PIP	GTCACGGCTGGGTTTATGT
		TGTGGGTATTCAGGGCATT
comp60089_c0_seq1	PIP	TTGACGGAGACTTGACGACG
		AGGCAGCCGATTGGGACG
comp60127_c0_seq1	PIP	ATGGCTAAAGATGTAGAGGGAG
		GAAGGGTGGCAACGAACT
comp65754_c1_seq1	PIP	ACCAAAGGCCCAAGCAAT
		ACCCTCCTCCAGCACCAT
comp68186_c0_seq1	PIP	CCAAATGGTCCTTTTACAGAGC
		CAAGCAATACCCAGAATCCC
comp68186_c2_seq1	PIP	GGGTTGGGTGCTGAGATTA
		GCCAGTGGATTGGGATGTG
comp68982_c0_seq1	PIP	ACACCAACAATGGCTCCTAA
		TGGCATGATCTTCGTCCTC
comp68992_c0_seq1	PIP	CCTTGGGGCTGAGATTGT
		ATGCCAGTTCCGGTGATG
comp62502_c0_seq1	TIP	GAAAAGCACCGCCAAAGG
		TGGGCAGCCAGATGCTCT
comp64456_c0_seq1	TIP	AAGTTGACATCCAATGCTGC
		AGAAGATGCCAGTGAGGACAG
comp64562_c0_seq1	TIP	GCTCGTGACTAGAGTTGCCGATGA
		TTGGCGGGTGGGGCTTTC
comp67635_c1_seq1	TIP	GCTGCCTTTGCTGAGTTCT
		GCTACAAGCCCAGACGGT
comp67635_c0_seq1	TIP	TGGGCCTGCTGTGGTCAG
		TGGGTAGGGGTTCGTGGG
comp70178_c0_seq1	TIP	ATCTGCCATTGCTTACGGT
		TGGTGATGTTGCCTCCAA
comp66107_c0_seq1	NIP	ATCACAACCAGTCCCCAAAC
		CCAACCAAGAATCAAGCAGT
comp70470_c0_seq1	NIP	GCAGGACCTATTGTGAATGAGA
		CCCGTGGACAGAATGACG
comp70470_c0_seq2	NIP	GCAGGACCTATTGTGAATGAGA
		GGAGATGTGGCCCGTGGA
comp64199_c0_seq1	SIP	CTGTGGGATTGGTTGTTGC
		TTCCTTTGCTATTGGTGGG
comp67247_c0_seq1	SIP	CCCATCCCATCACAGAGG
		GCTTGCCAGAAACATCCC
comp73412_c0_seq1	SIP	CACTGCCTCCTTTTACGCC
		CCCCTCAACGATAGCTCCA
comp73412_c0_seq2	SIP	CAGGCTTTCGGTGCTGTG
		CCCCTCAACGATAGCTCCA
comp65789_c0_seq1	Fe-SOD	GGATTATTCTCCGCTCCTTAC
		AACTGACTGCTTCCCACGA
comp65789_c0_seq2	Fe-SOD	TGGGCATGGCTTGCATAT
		CATCAATAGTAAGGATCGGAGA
comp65789_c0_seq3	Fe-SOD	GGATTATTCTCCGCTCCTTACGG
		GAACTGACTGCTTCCCACGAC
comp65789_c0_seq4	Fe-SOD	ATGGGCATGGGTTGCATATG
		TCATCAATAGTAAGGATCGG
comp61947_c0_seq1	CuZn-SOD	CGCAGGTGATTTGGGTAAC
		ACTGCCCTCCCAAGAATG
comp63868_c0_seq1	CuZn-SOD	ACCCACTTCCTCACTCCTCC
		CCCATCGTCTTCTTGGCTTA
comp68247_c0_seq1	CuZn-SOD	TGCCCCTGAAGACGAGAT
		GGACAACAACCGCCCTAC
comp70463_c0_seq1	CuZn-SOD	GAAAAGATTGAGATGGGGAGG
		CGGTGGCTACGACAACTGC
comp63735_c0_seq1	Mn-SOD	ACCACCTCCTTGACCTTCA
		CCAGAAGCACCGCCAGACT
comp70328_c0_seq1	Mn-SOD	CCTCAAGGGCTTTCTTTCTC
		GGTATTGATGTTTGGGAGCA
